# Supplementary material for: Truncated titin protein in dilated cardiomyopathy incorporates into the sarcomere and transmits force
Source: PubMed Central journal article supplement (PMC10786684; doi:10.1172/jci170196), 2024-01-16
Supplement: jci-134-170196-s025.pdf [file jci-134-170196-s025.pdf]

Unedited Gel and Blot images:

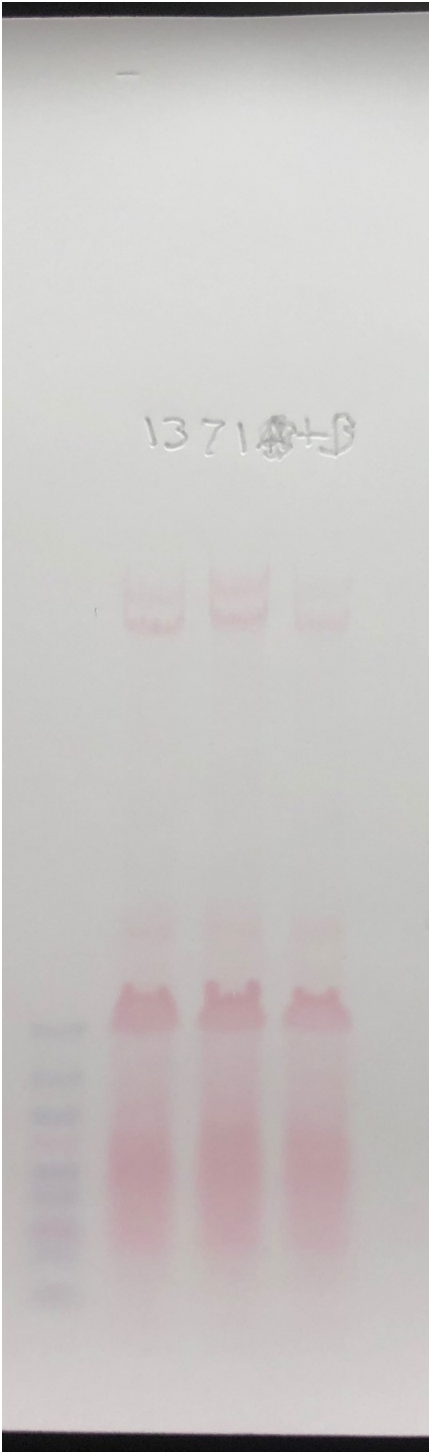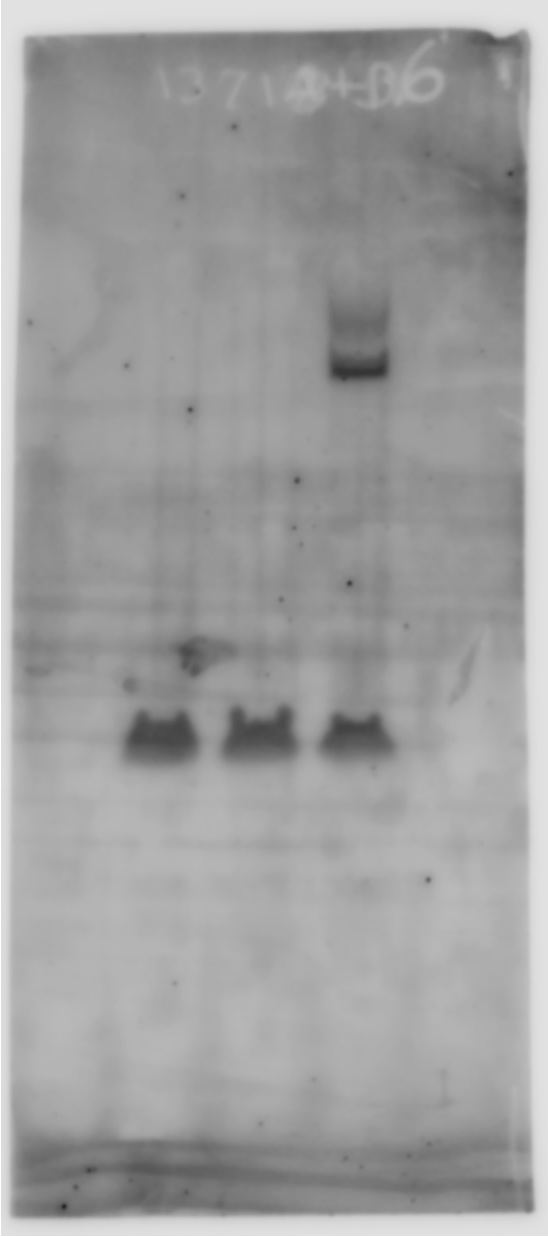

Unedited blots related to Figure Panel 2: Left, Ponceau stain imaged with color camera. Right, chemiluminescent western blot.
